1           **Intrinsic fluorescence in non-aromatic peptide structures is induced by collective**  
2           **vibrations, charge reorganisation and short hydrogen bonds, as shown in a new**  
3           **glutamine-related structure**

4  
5 Amberley D. Stephens,<sup>\*1</sup> Muhammad Nawaz Qaisrani,<sup>\*2,3</sup> Michael T. Ruggiero,<sup>4,1</sup> Saul T.E.  
6 Jones,<sup>5</sup> Emiliano Poli,<sup>2</sup> Andrew D. Bond,<sup>6</sup> Philippa J. Woodhams,<sup>1</sup> Elyse M. Kleist,<sup>7</sup> Luca  
7 Grisanti,<sup>8</sup> Ralph Gebauer,<sup>2</sup> J. Axel Zeitler,<sup>1</sup> Dan Credgington,<sup>5</sup> Ali Hassanali,<sup>2#</sup> Gabriele S.  
8 Kaminski Schierle<sup>1#</sup>

9  
10

11 <sup>1</sup>Chemical Engineering and Biotechnology, University of Cambridge, Cambridge CB3 0AS, UK  
12 <sup>2</sup>The Abdus Salam International Centre for Theoretical Physics, Strada Costiera 11, 34151 Trieste,  
13 Italy  
14 <sup>3</sup>International School for Advanced Studies, Via Bonomea 265, 34136 Trieste, Italy  
15 <sup>4</sup>Department of Chemistry, University of Vermont, 82 University Place, Burlington, VT, 05405 USA  
16 <sup>5</sup>Cavendish Laboratory, University of Cambridge, JJ Thomson Avenue, Cambridge, CB3 0HE, U.K  
17 <sup>6</sup>Department of Chemistry, University of Cambridge, Lensfield Road, Cambridge CB2 1EW, United  
18 Kingdom  
19 <sup>7</sup>Department of Chemistry, Syracuse University, Syracuse, New York 13244, United States  
20 <sup>8</sup>Division of Theoretical Physics, Ruđer Bošković Institute, Bijenička cesta 54, 10000 Zagreb,  
21 Croatia  
22 \* Contributed equally  
23 # Corresponding authors: [ahassana@ictp.it](mailto:ahassana@ictp.it), [gsk20@cam.ac.uk](mailto:gsk20@cam.ac.uk)  
24

25

26 **Abstract**

27 Disentangling the origin of the optical activity of non-aromatic proteins is challenging due to  
28 their size and thus their high computational requisites. Here we show, in a much smaller  
29 model system, that the single amino acid glutamine undergoes a chemical transformation  
30 leading to an unreported glutamine-like structure which has a similar broad absorption  
31 spectrum reported previously for non-aromatic proteins. We further show computationally  
32 that the optical activity of the glutamine-like structure is directly coupled to short-hydrogen  
33 bonds, but also displays charge and vibrational fluctuations, the latter of which are also  
34 present in less optically active structures such as in L-glutamine. Since experimentally the  
35 glutamine-like structure is the brightest structure, we conclude that short-hydrogen bonds  
36 are the ones responsible for the large Stokes shift observed in optically active non-aromatic  
37 proteins.

## 38 **Introduction**

39

40 Short peptides void of any aromatic residues have been shown to display an intrinsic  
41 fluorescence in the visible range (1, 2). This has primarily been observed in fibrillar protein  
42 structures linked to neurodegenerative diseases, such as Alzheimer's, Parkinson's and  
43 Huntington's diseases (3–6). Furthermore, optical properties of double amino acid based  
44 nanowires have also been reported, existing either of two non-aromatic or two aromatic  
45 amino acids (2, 7, 8). We have shown that the fluorescence of non-aromatic short crystal  
46 structures forming part of the amyloid-beta protein is enhanced by the presence of short  
47 hydrogen bonds (SHB) between the termini of prefibrillar structures (5). The SHB permits  
48 proton transfer leading to a double-well ground state potential which we have proposed  
49 prevents a conical intersection in the excited state (5). It has been suggested that one of the  
50 prerequisites for this fluorescence observed in either amyloid structures or short peptide  
51 nanowires is related to hydrogen bonding or aromatic interlocks which, for the latter,  
52 decreases the bandgaps down to the semiconductive regions (9).

53

54 Despite our previous suggestion that proton delocalisation is strongly coupled to this  
55 intrinsic fluorescence, its direct role and more importantly, the role of other vibrational  
56 modes on putative fluorescing states, has not been elucidated. We have thus searched for a  
57 model system, such as a single amino acid-based structure, that displays similar optical  
58 properties to amyloid fibrils and is permissive to more sophisticated computational  
59 approaches. We have been inspired by the small peptide nanostructures that have been  
60 pioneered by the Gazit laboratory (9) and by the fact that there are several  
61 neurodegenerative diseases that have been connected with an increased level of glutamines  
62 produced as part of a protein, as for example Huntingtin in Huntington's disease which  
63 renders the protein more aggregation prone (10). It has been known that the amide group  
64 in L-glutamine (L-glu) is highly labile and thus can rapidly hydrolyse. We show here that the  
65 single amino acid L-glu upon heating in water can form a nanostructural material with  
66 optical properties similar to the ones observed in other amyloid fibrils such as in fibrils of  
67 amyloid-beta, alpha-synuclein or tau (4, 11, 12).

68

69 Using X-ray diffraction (XRD), we show that L-glu dissolved in water and upon heating  
70 becomes cyclised forming a previously unreported structure which resembles L-  
71 pyroglutamine (which has been reported to be a component of amyloid-beta in the brain  
72 (13)), but involves a low-barrier hydrogen bonded anionic dimer with an ammonium  
73 counterion. We have termed the new structure, i.e. L-pyroglutamine complexed with an  
74 ammonium ion, L-pyro-amm. L-pyro-amm has a microcrystalline plate morphology as shown  
75 by scanning electron microscopy (SEM). The newly formed solid was further characterised  
76 using terahertz time-domain spectroscopy (THz-TDS), which provides information on the  
77 low-frequency modes in the crystal that control the proton transfer. Additionally, the  
78 experiments were interpreted using ground and excited state electronic structure  
79 calculations and molecular dynamics simulations. Ultimately, the combination of static  
80 structural information, atomic vibrational dynamics, and optical properties enable the  
81 origins of fluorescence in this particular structure to be elucidated, shedding light on the  
82 complementary processes in more complex systems.

83

## 84 **Methods**

85

### 86 *Experimental*

#### 87 *Sample preparation of L-glutamine*

88 L-glutamine (L-glu) (#G3126, #G8540, Sigma-Aldrich, Gillingham, UK) and L-pyroglutamine  
89 (L-pyro) (#83160, Sigma-Aldrich) were dissolved in 18.2 $\Omega$  MilliQ H<sub>2</sub>O at a concentration of  
90 0.3 M or 1 M. Aliquots were placed in a 65°C oven, since heating up proteins to 65°C  
91 increases the formation of amyloid structures as reported previously (14). Each aliquot was  
92 rotated to dissolve the powder once a day. Samples were either analysed in liquid form or  
93 dried on a glass or quartz cover slip (#043210.KG, Alfa Aesar, Lancashire, UK) either at room  
94 temperature (RT) or on a heat block set to 50°C.

95

#### 96 *Emission and excitation wavelength scans*

97 Emission and excitation spectra were taken on a Hitachi F-4500 FL spectrophotometer  
98 (Hitachi High-Technologies Corporation, Tokyo, Japan) at RT in a quartz cuvette. For  
99 measurements, the excitation slit resolution was 5 nm or 10 nm and the emission slit  
100 resolution was 20 nm. The PMT voltage was set at 950 V and the scan speed set at 240

101 nm/min. The excitation scan was measured between 250 – 400 nm and the emission filter  
102 set to the emission maxima of the sample stated in the figure legend, with a slit resolution  
103 of 20 nm. The emission scan was measured between 380 - 560 nm and the excitation filter  
104 set to the excitation maxima of the sample stated in the figure legend, using a slit resolution  
105 of 5 nm. Four measurements were taken for each sample which was repeated at least three  
106 times and the background (air or H<sub>2</sub>O) was subtracted from the average.

107

#### 108 *Absorption measurements*

109 Absorption measurements were taken on a UV-Vis-NIR Spectrophotometer, UV-3600 Plus  
110 (Shimadzu, Kyoto, Japan) and Cary 6000i (Agilent, Santa Clara, USA). 1 M or 0.3 M L-glu, L-  
111 pyro or L-pyro-amm solutions were measured in 10 mm QX cuvettes (Hellma Analytics,  
112 Müllheim, Germany) or dried on quartz coverslips. Measurements were taken between  
113 wavelengths 200 – 800 nm using 1 nm steps at a slow scan speed and a 1 nm resolution. The  
114 light source change wavelength was set at 393 nm and the grating change wavelength set at  
115 750 nm. Samples were measured at least three times and the experiments repeated at least  
116 three times, measurements were then averaged and H<sub>2</sub>O or coverslip only control was  
117 subtracted.

118

#### 119 *SEM (scanning electron microscopy)*

120 SEM was performed using a FEI Magellan 400 HR-SEM at an acceleration voltage of 2 kV. L-  
121 pyro-amm samples were lyophilised by freezing in liquid nitrogen and freeze drying in a  
122 LyoQuest 85 (Telstar, Terrassa, Spain) and imaged on a glass coverslip.

123

#### 124 *X-ray diffraction*

125 L-pyro-amm was dried on a glass coverslip in a 50°C oven and then at RT until crystals  
126 formed. Single crystal X-ray diffraction (SCXRD) measurements were performed at 180 K  
127 with a Bruker D8-QUEST PHOTON-100 diffractometer, which utilised a Cu K $\alpha$  radiation ( $\lambda =$   
128 1.54 Å), and an APEX-II CCD. Absorption corrections were made using SDABS, and data  
129 integration and reduction were performed with SAINT+. All non-hydrogen atoms were  
130 refined isotropically and anisotropically, followed by inclusion of the hydrogen atoms  
131 (determined using the excess electron density) and refinement isotropically.

132

### 133 *Terahertz Time-Domain Spectroscopy*

134 All THz-TDS spectra were acquired using a commercial Terapulse 4000 spectrometer  
135 (TeraView Ltd, Cambridge, UK). Samples were prepared for THz-TDS measurements by  
136 diluting the solid air dried L-pyro-amm with polyethylene (~ 10% w/w concentration) by  
137 gentle mixing using an agate mortar, followed by pressing into 2 mm thick, 13 mm diameter  
138 pellets using a hydraulic press. All THz-TDS spectra shown are a result of division of sample  
139 and blank datasets, with the blank dataset represented the THz-TDS response of a pellet of  
140 pure polyethylene.

141

### 142 *Theoretical*

#### 143 *DFT-THz Calculations*

144 Calculations were performed using both the CRYSTAL17 (15) and Quantum Espresso (16)  
145 software packages. Geometry optimisations and vibrational analyses performed with the  
146 CRYSTAL17 code utilised the atom-centred split-valence triple-zeta 6-311g(2d,2p) basis set  
147 for all atom types. Based on a previous study related to ionic molecular crystals (17), the  
148 range-corrected WB97-X (18) functional was used. The vibrational analysis was performed  
149 within harmonic approximation, and infrared intensities were determined using the Berry  
150 Phase method. Energy convergence criteria were set to  $\Delta E < 10^{-8}$  and  $10^{-11}$  hartree for the  
151 geometry and frequency calculations, respectively.

152

#### 153 *Periodic TD-DFT Excited State Calculations*

154 Simulations were performed using the fully periodic Quantum Espresso software package.  
155 The Becke-Lee-Yang-Parr (B3LYP) hybrid density functional was used with an energy cutoff  
156 of 40 Ry. The calculations of the excited state were performed within the framework of  
157 TDDFT using the Liouville-Lanczos formalism implemented in the freely available Quantum-  
158 Espresso package (19). In this approach, the optical spectra are obtained directly over the  
159 wide spectral range without taking into account the numerically complex calculations of the  
160 single excited states. We used plane wave basis set and the electron-ion interactions were  
161 taken into account via norm conserving Martins-Troullier pseudopotentials (20). To  
162 determine the ground state wave function, we used the gamma point of the Brillouin zone.  
163 All the periodic calculations employed the computationally demanding B3LYP (21) hybrid

164 functional, the kinetic energy cutoff of 40 Ry was used for the wave functions. The intrinsic  
165 band width for the spectra was set to 0.003 Ry ( $\sim 0.0408$  eV).

166

#### 167 *Periodic Structure Geometry Optimisation*

168 The structures obtained from the experiments were first geometrically optimized at 0°K  
169 using the Broyden-Fletcher-Goldfarb-Shanno (BFGS) minimisation algorithm implemented in  
170 CP2K (22, 23) package. A convergence criterion for the wave function optimisation was used  
171 as  $5 \times 10^{-7}$  a.u. Applying the method of the Gaussian and plane wave, the wave function was  
172 expanded in the Gaussian double-zeta valence polarised (DZVP) basis set. The cutoff for the  
173 electronic density was set to 300 Ry. We used the gradient correction to the local density  
174 approximation and the core electrons were treated via Goedecker-Teter-Hutter  
175 pseudopotentials (24). In all the calculations, we used the Becke-Lee-Yang-Parr (BLYP) (25)  
176 functional with the D3(0) Grimme (26) dispersion corrections for the van der Waals  
177 interactions.

178

#### 179 *Ab Initio Molecular Dynamics Simulations*

180 Ab initio Molecular Dynamics simulations (AIMD) were performed using Quickstep  
181 algorithm implemented in CP2K. In these calculations, the propagation of the nuclei was  
182 taken into account within the framework of the Born-Oppenheimer approximation. The  
183 simulations were performed in the NVT ensemble and the temperature was controlled  
184 during the simulations by using the velocity-rescaling thermostat (27). We used the time  
185 step of 0.5 femtosecond to update the nuclear coordinates and velocities while the total  
186 length of the simulations for each system is 50 picoseconds.

187

#### 188 *Excited State Cluster Calculations*

189 A set of excited state calculations were performed on glutamine clusters in order to  
190 understand the role of the environment on the optical properties. Specifically, the optical  
191 properties of L-pyro-amm were investigated using various isolated cluster models with the  
192 Gaussian09 software package. The clusters were extracted directly from the crystal  
193 structure and used in various combinations (dimers, trimers, tetramers) to perform time-  
194 dependent DFT (TD-DFT) calculations. A split-valence triple-zeta 6-311g(2d,2p) basis set was  
195 used for all atom types together with the hybrid B3LYP functional. Some benchmark

196 simulations, comparing the optical properties obtained from the periodic calculations using  
197 B3LYP to range corrected hybrid functionals like CAM-B3LYP, were also performed with  
198 these clusters.

199

200 We also performed a series of excited state optimisations on various model systems built  
201 from L-pyro-amm in order to examine the nature of the geometrical distortions that occur  
202 on the lowest electronic excited state. These calculations were also performed with the  
203 Gaussian09 software package. All clusters were surrounded with a continuum dielectric  
204 constant of 80, representing pure H<sub>2</sub>O. The 6-311G(2d,2p) basis set was used for all atoms  
205 together with the range corrected hybrid functional CAM-B3LYP (28). The clusters were first  
206 optimised in the ground state after which they were optimised on the first electronic  
207 excited state.

208

## 209 **Results and Discussion**

210

211 It has long been known that poly-glutamine can form amyloid-like fibrillar structures *in vitro*.  
212 The more glutamine residues in the poly-glutamine polymer, the faster the aggregation  
213 propensity of the polypeptide chain. This led us to investigate whether L-glu on its own  
214 under conditions which normally promote fibril formation, such as an increase in  
215 temperature (14), was able to form structures with similar optical properties, as recently  
216 observed for amyloid fibrils (5, 29, 30).

217

218 We first investigated the structure of L-pyro-amm, which formed after incubation of L-glu  
219 for 8 days at 65°C, using SEM and observed crystal structures shown in Fig.1a. However, in  
220 order to investigate whether L-glu had indeed changed its crystal structure arrangement we  
221 performed XRD analysis of the resulting material. In Fig.1b we show the crystal structure of  
222 the heated L-glu structure, which we termed L-pyro-amm, and the published crystal  
223 structures of L-glu and L-pyroglutamine (L-pyro) in Fig. 1c and d. Note, the L-pyro structure  
224 was analysed as it displayed structural similarities to the newly formed L-pyro-amm. Figures  
225 were obtained from geometry optimisations of the nuclear positions of the atoms using  
226 experimental densities. L-pyro-amm consists of 8 pyroglutamine groups and 4 ammonium  
227 ions (144 atoms) complexed within the crystal (see Fig. 1b). In contrast, as shown in Fig. 1c,

228 L-glu consists of 4 glutamine molecules (80 atoms) in the unit cell which form hydrogen  
229 bonds involving the termini and side chain. Furthermore, as shown in Fig. 1d, L-pyro consists  
230 of 12 pyroglutamine molecules (192 atoms) in the unit cell forming hydrogen bonds  
231 involving the NH and COOH groups.

232

233 L-pyro-amm has a rather unique hydrogen bond network structure since four of the  
234 pyroglutamine molecules are deprotonated and hence have a nominal negative charge,  
235 while the other four molecules are neutral. One of the important implications of this  
236 difference is that L-pyro-amm contains a very strong hydrogen bond. The red circled region  
237 in Fig. 1a corresponds to a short hydrogen bond (SHB) with a length of 2.45 Å, while those in  
238 L-glu and L-pyro range between ~2.55-2.85 Å.

239

240 The structural change was further confirmed using THz-TDS measurements, as this  
241 technique is strongly dependent on the bulk packing arrangement (as well as on the internal  
242 covalent structure) of the molecules (31). The THz-TDS spectrum of the resulting solid, as  
243 well as the solid-state DFT predicted spectrum based on the single crystal XRD (SCXRD)-  
244 determined structure, is shown in Fig. 1e (full spectral assignment available in Suppl. Fig. 1).  
245 The agreement between the experimental and theoretical spectra further supports that full  
246 conversion of the sample occurs and thus enables additional investigations into the  
247 structural and electronic properties of the material.



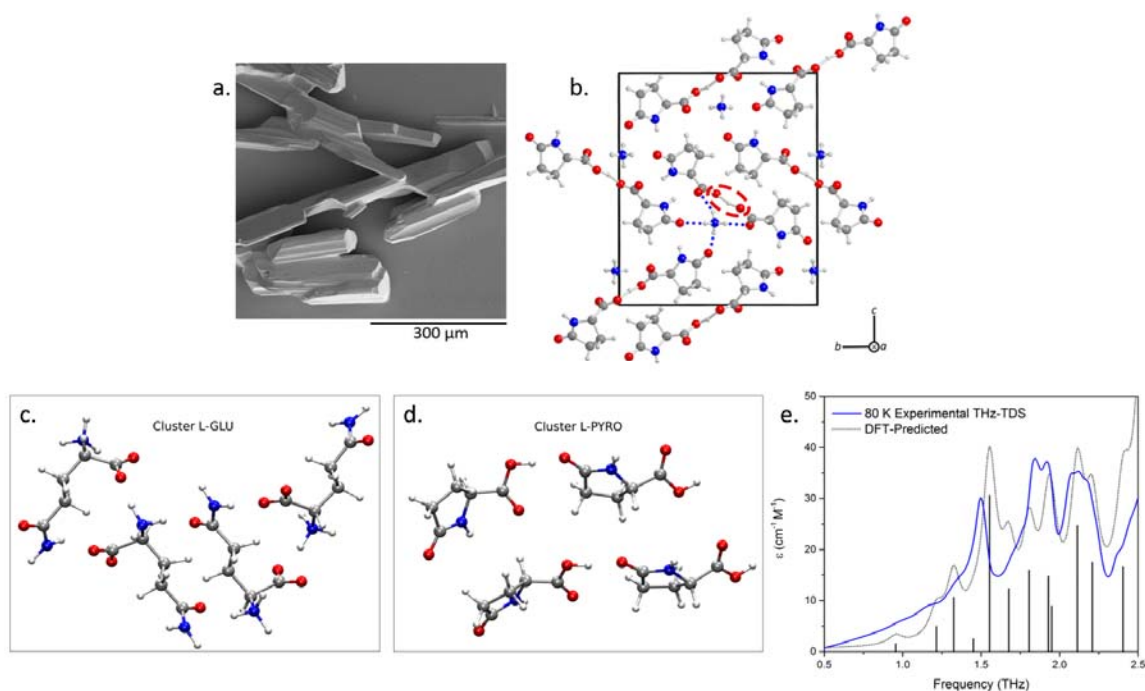

248

249 **Figure 1. L-glu forms L-pyro-amm upon heating.**

250 (a) SEM image of crystals of L-pyro-amm dried. (b) XRD analysis of heated L-glu sample  
251 show the newly formed structure, L-pyro-amm. Geometry optimisations show that 8  
252 pyroglutamine groups and four ammonium ions (144 atoms) are complexed in the crystal  
253 and a SHB of 2.45 Å (within red dashed lines) is present near the ammonium ion (linked by  
254 bonds highlighted by blue dotted lines) (white-hydrogen, red-oxygen, blue-nitrogen, grey-  
255 carbon). (c) Clusters of L-glutamine and (d) L-pyroglutamine. (e) Experimental (blue line) and  
256 theoretical (grey line) THz-TDS of the L-pyro-amm sample are in agreement and confirm the  
257 presence of the new L-pyro-amm structure.

258

259 We first investigated whether there were any differences in the optical properties  
260 associated with the three crystal structures. Comparing the absorption of L-glu, L-pyro and  
261 L-pyro-amm in water, we show that only L-pyro-amm has a significantly red-shifted  
262 absorption which lies in the 275-320 nm range, whereas both L-glu and L-pyro primarily  
263 absorb in the deep UV (<250 nm) (see Fig. 2a).

264

265 We next compared the experimental absorption spectra of L-glu, L-pyro and L-pyro-amm  
266 with the ones obtained from time dependent density functional theory (TDDFT). We  
267 highlight here, that the small size of the systems permitted us to determine the spectra

268 using a hybrid functional, thereby not only advancing the quality of our theoretical  
269 predictions from previous studies (5, 29, 30) but also coupling the optical properties directly  
270 to different vibrational modes.

271

272 Fig. 2b illustrates the absorption spectra obtained for the TDDFT calculations on the 3  
273 periodic systems in the ground state (i.e. at 0 K). Panel b.i) shows the relative oscillator  
274 strength as a function of the frequency while panel b.ii) illustrates the second derivative of  
275 the oscillator strength permitting the positions of the maxima in the spectra to be more  
276 easily identified. The spectra reveal some striking differences between the different  
277 systems. Interestingly, we observe that L-pyro is essentially dark throughout the frequency  
278 range up to  $\sim 6$ eV. On the other hand, L-pyro-amm shows the presence of more structure in  
279 the spectrum. Specifically, it is the only system for which the spectrum features a low  
280 energy excitation at 226 nm (5.5 eV) and subsequently other peaks slightly above 220 nm  
281 (5.625eV) and 216 nm (5.75eV). While L-glu exhibits a peak at 222 nm (5.58eV), it is dark up  
282 to 206 nm ( $\sim 6$ eV). These calculations were performed with the B3LYP functional.  
283 Importantly, we have found that upon using more accurate functionals such as CAM-B3LYP  
284 (28) and WB97-X (18) L-pyro-amm remains the most optically active.

285

286 We have previously shown that thermal fluctuations and in particular nuclear vibrations,  
287 such as proton transfer, have a large impact on the absorption spectra of peptide structures  
288 compared to absorption spectra at 0 K (5, 32–34). In Fig. 2c we show that, compared to the  
289 0 K spectra in Fig. 2b, thermal fluctuations cause a large red shift to around 3.4 eV (365 nm)  
290 for L-pyro-amm, close to what is observed experimentally. These spectra were computed  
291 averaging over 25 frames sampled from the molecular dynamics simulations. Interestingly,  
292 no such effect is observed for L-glu which remains weakly absorbing up to more than 5 eV  
293 (247 nm) as seen at 0 K.

294

295 Similar to our previous studies on the intrinsic fluorescence of amyloid-beta fibrils,  
296 absorption is significantly increased in structures containing SHB, as neither L-glu, nor L-pyro  
297 display a significantly red shifted absorption. In order to understand better the physical  
298 origin of the low energy excitation at 226 nm ( $\sim 5.5$  eV) in L-pyro-amm, we computed the

299 electron response density at this frequency. This is illustrated in Fig. 2d, where we observe  
300 that most of the electron response involves regions around the pyroglutamine rings as well  
301 as regions near the SHB (see dashed circle in Fig. 2d). The optical response thus involves a  
302 collective charge reorganisation involving several parts of the molecular crystal.

303

304 We next investigated whether the above structures also display fluorescence excitation and  
305 emission properties as has been observed for amyloid-like structures reported previously (5,  
306 29, 30). Fig. 2e shows the excitation scan from 250-400 nm (solid lines) with the emission  
307 set at 430 nm of L-glu in water at day 0 to 8 after incubation at 65°C. Interestingly, we  
308 observe an excitation peak at around 360 nm which is similar to what we have measured  
309 previously for amyloid proteins (5). The corresponding emission scan (dashed lines) with the  
310 excitation set at 360 nm and emission from 380-560 nm showed an emission peak around  
311 430 nm, again lying in the same visible range as for amyloid fibrils. When the L-pyro-amm  
312 solution was dried the excitation and emission peaks were slightly blue shifted (Suppl. Fig.  
313 2a) which may be due to a change in the molecular environment in the dried state.  
314 Importantly, we do not see any fluorescence in L-glu (without heating, i.e. at day 0 Fig. 2e.).  
315 To determine the importance of the ammonium ion experimentally, L-pyro has been  
316 incubated in water and heated at 65°C for 8 days, and only a very weak fluorescence has  
317 been detected (Suppl. Fig. 2b).

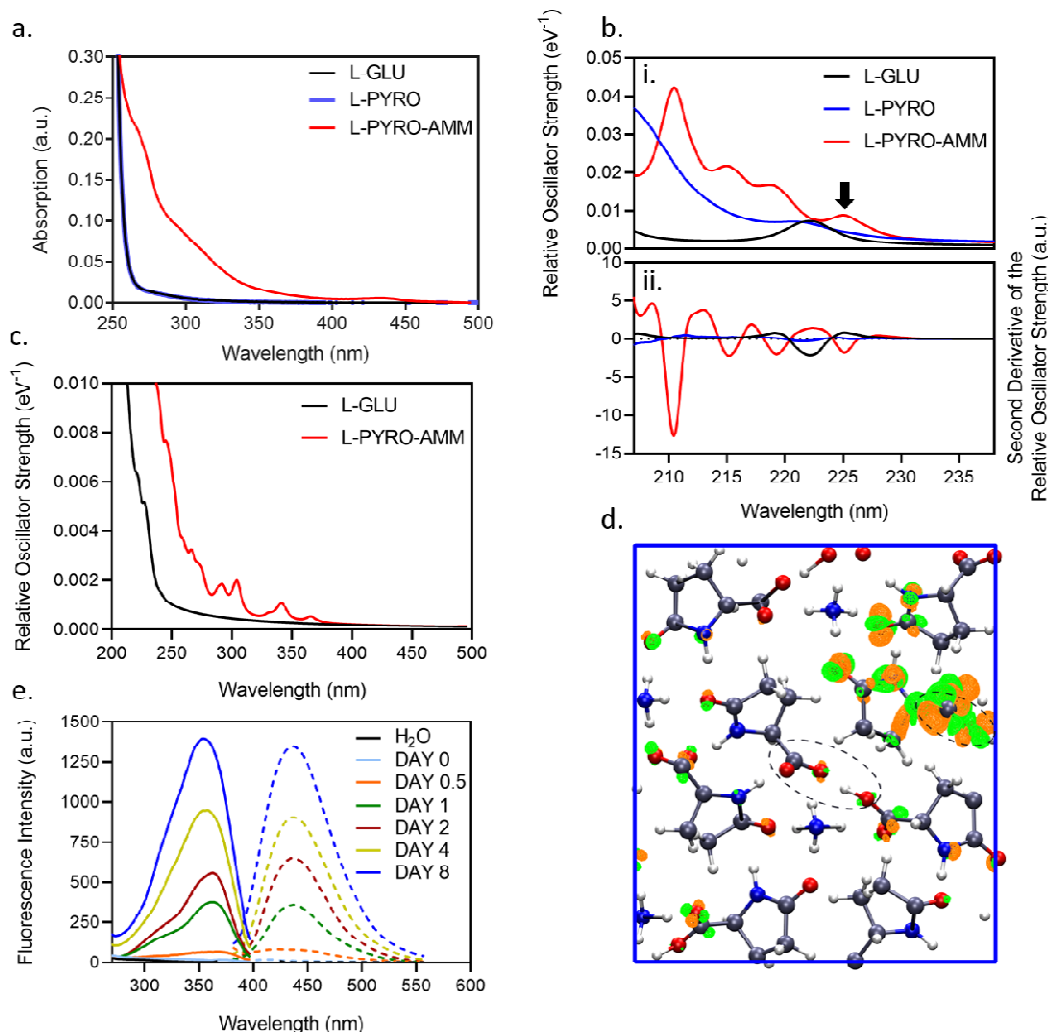

318

319 **Figure 2. Optical properties of L-pyro-amm are distinct from L-glu and L-pyro**

320 (a) Absorption spectra of 0.3 M L-glu (black), L-pyro (blue) and L-pyro-amm (red) (L-glu  
 321 incubated for 8 days at 65°C) in water taken between 200 – 500 nm shows primarily  
 322 features of L-pyro-amm. (b) Absorption spectra of L-glu, L-pyro and L-pyro-amm obtained  
 323 from periodic density functional theory calculations with the B3LYP functional. L-pyro-amm  
 324 features the lowest lying excited states which are characterised by the largest oscillator  
 325 strengths. (c) Absorption spectra for L-glu and L-pyro-amm obtained from periodic  
 326 simulations at room temperature. The spectra were computed by averaging over 25 frames  
 327 randomly sampled from the *ab initio* molecular dynamics simulations. (d) The excited state  
 328 electron density computed for L-pyro-amm from the optimised structure computed at the  
 329 first peak (arrow in panel b). The lowest excited state density shows a response from various  
 330 parts of the crystal structure including the pyroglutamic acid ring and the SHB region (see

331 dashed circle). The orange and green surfaces correspond to regions involving a decrease  
332 and increase in electron density respectively, shown at an iso-value of  $1 \times 10^{-5}$ . (e) 1 M L-glu  
333 was incubated at 65°C and the excitation and emission spectra were measured over time.  
334 Excitation spectra were measured between 250-400 nm with emission set at 420 nm and  
335 emission spectra were measured between 380-560 nm with the excitation set at 360 nm.

336

337 It is not possible to directly pinpoint the exact mechanisms and origins of the difference in  
338 the optical properties between the three systems from the ground state calculations at 0 K.  
339 As alluded to earlier, one of the factors that distinguishes L-pyro-amm from the other  
340 systems is the presence of the SHB (highlighted by red circles in Fig. 1a) and the presence of  
341 the ammonium ion. In order to characterise the behaviour of the SHB, we conducted *ab*  
342 *initio* molecular dynamics simulations of the three systems at 300 K and examined the  
343 proton transfer coordinates defined as the difference in distance between the proton (H)  
344 and the two oxygen atoms (O1 and O2) that sandwich it and is commonly referred to as the  
345 proton transfer coordinate ( $d_{O1-H} - d_{O2-H}$ ) as shown in Fig. 4a for different types of hydrogen  
346 bonds in the crystals. It is clear that the SHB in L-pyro-amm is characterised by a double-well  
347 potential. The barrier associated with this proton transfer is on the order of thermal energy,  
348 indicating that zero-point energy (ZPE) would make the proton transfer barrierless (35). An  
349 examination of similar proton transfer coordinates for hydrogen bonds in L-glu and L-pyro  
350 show that they are characterised by only single-well potentials.

351

352 The nature of the optical properties is sensitive to the environment in which the glutamine  
353 molecules reside. It has previously been reported that charged amino acids already display  
354 an absorption in the range of 250-350 nm that is significantly red shifted (36, 37). The  
355 origins of the low energy absorption were attributed to charge transfer excitations. The  
356 simulations of these systems were performed in the gas phase, rather than considering the  
357 protein environment such as shown for L-pyro-amm in Fig 2d. In comparison to the results  
358 presented in Fig. 2d, data presented in Fig. 3, show that the origins of the electronic  
359 transitions equally arise from a charge transfer (CT) between the highest occupied  
360 molecular orbital (HOMO) on the anionic dimer, and the lowest unoccupied molecular  
361 orbital (LUMO) centred on the ammonium cation when performed in the gas phase.  
362 Interestingly, the correct transition energy is only predicted when the ammonium cation is

363 spatially near the centre of the dimer, which corresponds to the delocalisation of the  
364 negative charge and the SHB. Two generalised geometries, with the ammonium cation near  
365 the SHB (as seen in Fig. 3a) and away from the SHB (Fig. 3b), with the corresponding HOMO  
366 and LUMO orbitals are shown. The results predict a transition of 303.50 nm for dimer a. and  
367 668.66 nm for dimer b., with dimer a. most closely resembling the chemical environment  
368 present within the crystalline material.

369

370 The results show that charge transfer is capable to lead to absorption in the far UV when  
371 investigated in the gas phase, i.e. neglecting the direct protein environment. However,  
372 including the protein environment in the molecular crystal (Fig. 2d) results instead in the  
373 excitation being a charge reorganisation involving several different molecular groups of the  
374 crystal. Indeed, by shuffling the protons along the SHBs in the ground-state, we observe an  
375 electronic response involving the entire structural units of L-pyro-amm including both the  
376 hydrogen bonded regions and the pyroglutamic acid rings when the protein environment is  
377 accounted for (Suppl. Fig.3b i-iv).

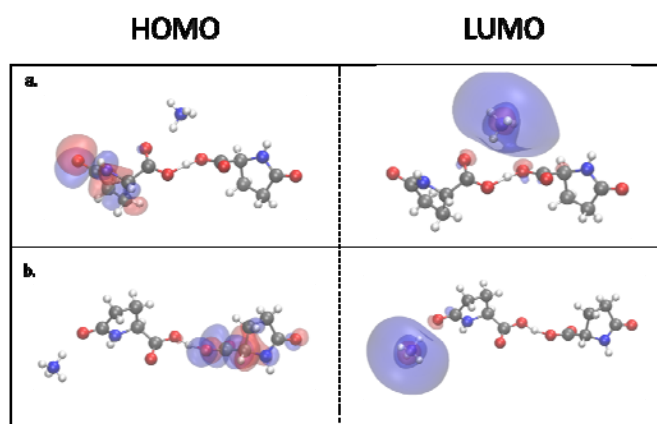

378

379 **Figure 3. Comparison of the HOMO and LUMO orbitals on two L-Pyro-Amm models.**

380 L-pyro-Amm structures are presented where the ammonium cation is located directly near  
381 the hydrogen bond (a), and where the ammonium cation is located away from the hydrogen  
382 bond (b). While both models predicted charge-transfer HOMO-LUMO states, only in the  
383 case of (a) is the transition predicted to be in the vicinity of the experimentally observed  
384 peak, 303.50 nm compared to 668.66 nm for (b).

385

386 Up to this point, we have shown that the vibrations of protons along SHBs are an important  
 387 part of the structural fluctuations in the ground state structure of L-pyro-amm. These  
 388 calculations however, do not say anything about the nuclear relaxation upon photo-  
 389 excitation which is most relevant for fluorescence. In a final set of theoretical studies, to  
 390 ascertain the role of the proton transfer in the ground state, as well as to elucidate the  
 391 presence of other types of vibrational modes, we performed a series of geometry  
 392 optimisations on the first excited state of a cluster carved out from L-glu, L-pyro and L-pyro-  
 393 amm crystals and surrounded by a continuum dielectric constant of 80.  
 394  
 395

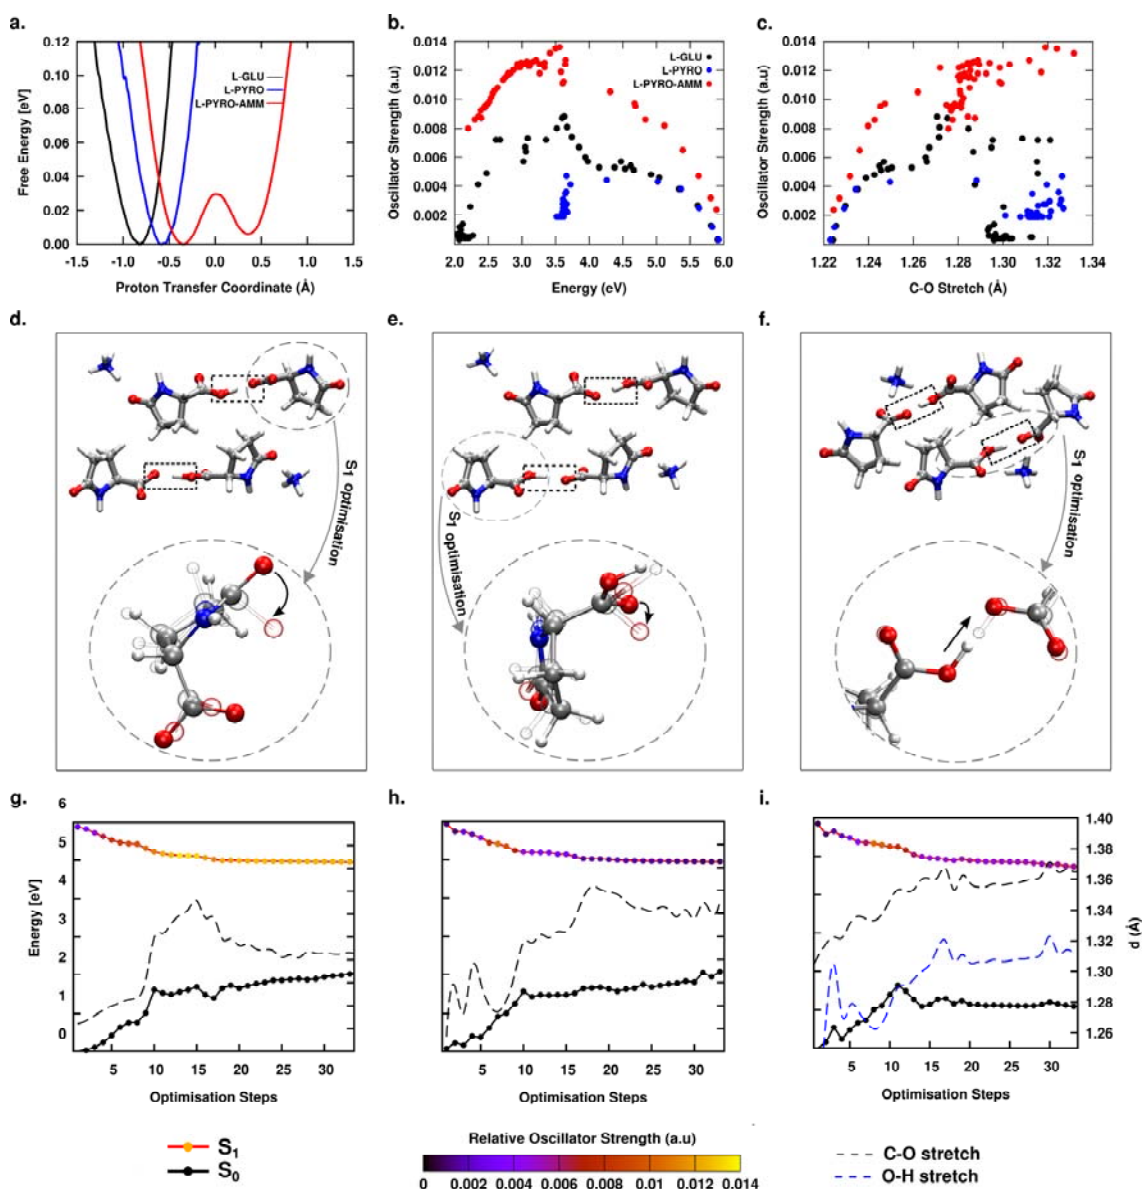

396

397 **Figure 4. Collective vibrations affect the emission in L-pyro-amm**

398 a) Shows the proton transfer free energy profiles along several hydrogen bonds in L-glu, L-  
399 pyro and L-pyro-amm obtained from ground-state ab initio molecular dynamics simulations.  
400 Note, the SHB in L-pyro-amm is characterised by a double-well potential. b) Scatter plot of  
401 the oscillator strengths versus the emission energy (defined as the difference between the  
402 first excited state and the ground-state) during the excited optimisations for L-glu, L-pyro  
403 and L-pyro-amm. c) Scatter plot of the oscillator strengths versus the distance of the  
404 carbonyl bond (C=O) that extends during the excited state optimisation in L-glu, L-pyro and  
405 L-pyro-amm. d)-f) Snapshots of three different systems of L-pyro-amm that were optimised  
406 on the excited state. In clusters shown in d) and e) the initial position of the proton along  
407 the SHB has been changed, and in f) the ammonium ion has been placed closer to the SHB  
408 region. The bottom panel of d), e) and f) show zoomed in plots of the main regions of the  
409 cluster (circled in the top panels) that undergo significant changes. g)-i) Ground and excited  
410 state energies are plotted as a function of the excited state optimisation for the three  
411 systems shown in panels d-f). The curves on the excited state are colour-coded with the  
412 oscillator strengths.  $S_0$  and  $S_1$  refer to the ground and excited state energies, respectively.  
413 The right-side of the y-axis corresponds to C=O bond lengths (dashed black lines) for g) and  
414 h). In panel i), where there is a proton transfer on the excited state, the dashed blue lines  
415 correspond to the O-H distance along the SHB on the same distance scale.

416

417 Fig. 4b shows a scatter plot of the difference between the first excited state and ground-  
418 state energies and the corresponding oscillator strengths. The scatter plots were obtained  
419 over the course of the excited state optimisation. We observe that the L-pyro-amm system  
420 is characterised by the largest oscillator strengths compared to L-glu or L-pyro. One of the  
421 major structural changes that occurs upon excitation is an increase in the C=O bond length  
422 similar to observations in previous studies (38–40). Fig. 4c shows the oscillator strengths as  
423 a function of the C=O bond, that increases in length by about 0.1 Angstroms.

424

425 Although all three glutamine-related structures display similar trends on the excited state,  
426 what makes L-pyro-amm unique is the presence of the SHB. Fig. 4b and c show that L-pyro-  
427 amm displays the largest oscillator strength peaking at approximately 3.5eV consistent with  
428 our experimental findings. Although L-glu also has a peak at around 3.5 eV it is much weaker



429 than the one of L-pyro-amm. We thus decided to focus on a series of excited state  
430 optimisations for various clusters of L-pyro-amm. In particular, we focused on the proton  
431 transfer in the ground state as seen in the double-well potential and on the proximity of the  
432 ammonium ion to the short hydrogen bond region, all shown to play an important role in  
433 the optical properties of L-pyro-amm so far. We thus constructed three clusters with  
434 different initial conditions, which are shown in the top panels of Fig. 4d-f. The clusters  
435 shown in Fig. 4d and 4e differ in the initial positions of the protons along the SHB. As seen in  
436 Fig. 4a, the ground-state simulations of L-pyro-amm present a double-well potential in the  
437 finite temperature simulations. We thus moved the proton along one of the SHBs,  
438 constrained the geometry in the ground-state which yielded the cluster shown in Fig. 4e. In  
439 Fig. 4f, the ammonium ion is placed closer to the SHB region.

440

441 The circled regions in Fig. 4d-f highlight the main regions, where the nuclear degrees of  
442 freedom respond in the excited state. The bottom panels show a zoomed in image of the  
443 changes that occur upon relaxation, for which the solid and transparent structures  
444 correspond to geometries obtained before and after the relaxation on the excited state,  
445 respectively. The bottom panel of Fig. 4d illustrates that the change involves the C=O stretch  
446 and deplanarisation of the peptide dihedral angle of the ring. The corresponding evolution  
447 of the first excited state and ground state energies as a function of optimisation is shown in  
448 Fig. 4g. The relaxation on the excited state narrows the energy difference between the  
449 ground and excited state to approximately 3.5eV which is consistent with the experiments.

450

451 The top panels of Fig. 4e and f involve two other initial conditions for which the proton  
452 vibrations and the proximity of the ammonium ion to the SHB are altered. We see in Fig. 4h  
453 and i that the magnitude of the oscillator strength of L-pyro-amm in the excited state is  
454 sensitive to these new initial conditions. Transferring the protons on the ground-state (see  
455 dotted black rectangles in Fig. 4d-f), significantly changes the oscillator strengths as seen in  
456 the comparison between Fig. 4g-i, across the entire relaxation process in the first excited  
457 state while still maintaining the C=O stretch and deplanarisation as seen in the bottom  
458 panel of Fig. 3e. In the case of Fig. 4f, besides the reorganisation involving the C=O stretch,  
459 we also observe a proton transfer along the SHB. This is seen in Fig. 4i, which shows the O-H  
460 stretch (dashed-blue curve) along the SHB during the optimisation which increases from

461 1.26 to 1.32 Angstroms. The zoomed in plot in the bottom panel of Fig. 4f shows this subtle  
462 change in the proton transfer coordinate. Thus, the evolution of the excited state in L-pyro-  
463 amm into the region displaying visible fluorescence appears to involve a collective  
464 reorganisation of various vibrational modes forming the hydrogen bond network with the  
465 SHB playing a particular role, as it leads to the brightest structure, also confirmed  
466 experimentally. These findings are also consistent with some recent theoretical work  
467 showing the importance of proton transfer in self-assembled peptides made of aromatic  
468 phenyl-alanine amino acids (41). However, the latter structure features an aromatic amino  
469 acid, whereas we observe similar optical properties in non-aromatic structures.

470

## 471 **Conclusions**

472

473 The experimental and theoretical findings presented here, elucidate a rather complex  
474 molecular mechanism associated with the non-aromatic intrinsic fluorescence in protein-  
475 like structures. In the case of L-glutamine, a chemical reaction creates a newly formed  
476 structure involving a cyclised pyroglutamic acid ring. This new structure features absorption  
477 in the UV and emission in the visible range very similar to the chemically distinct amyloid  
478 fibrils (4, 5, 11, 12, 41–43).

479

480 The structural chromophore responsible for the optical properties in this new protein-  
481 related structure arises from a hydrogen bond network characterised by specific vibrational  
482 fluctuations on the excited state. The presence of strong hydrogen bonds along which  
483 proton transfer occurs and secondly, specific ionic interactions in close proximity, such as  
484 involving the ammonium ion, affect the optical properties. Although the fluorescence  
485 observed in these systems is much weaker than those compared to conventional  
486 fluorophores, the physical and chemical properties of the hydrogen bond network reported  
487 here maybe a generic feature across many other peptide structures.

488

489 In summary, we show here that there are several vibrational modes in biological structures  
490 that contribute to fluorescence properties as shown by excited state simulations and  
491 confirmed experimentally. We further show that the protein environment strongly  
492 contributes to the optical activity of the protein like structure and that the SHB significantly

493 enhances the fluorescence signal detected, potentially by inhibiting a conical intersection in  
494 the excited state as discussed previously (5). Interestingly, SHBs have recently been  
495 observed in different biological systems which have long been associated with either  
496 intrinsic fluorescence, such as NADP/NAD (44), FAD/FMN (45), the light-sensing  
497 chromophore in photoactive yellow protein (46), or in the active site of many enzymes, such  
498 as hydrolases and oxidoreductases (47, 48), many of which consist of a highly complex H-  
499 bond structure similar to amyloid proteins. Our findings may thus further the design of  
500 novel optically active biomaterial for applications in optical sensing or the design of novel  
501 biocompatible catalysts.

502

### 503 **Author Information**

#### 504 **Corresponding Authors**

505 Ali A. Hassanali, [ahassana@ictp.it](mailto:ahassana@ictp.it)

506 Gabriele S. Kaminski Schierle, [gsk20@cam.ac.uk](mailto:gsk20@cam.ac.uk)

507

#### 508 **Author Contributions**

509 \*A.D.S and M.N.Q contributed equally. A.D.S, prepared samples for all experimental data.  
510 P.J.W. performed SEM experiments. A.D.B and M.T.R performed XRD measurements and  
511 analysed data. M.T.R. performed THz experiments and DFT-THz calculations and analysed  
512 data. A.D.S. performed excitation and emission measurements and analysed data. A.D.S and  
513 S.T.J. performed absorption measurements and analysed data. M.T.R and E.M.K performed  
514 TD-DFT cluster calculations. M.N.Q, E.P, L.G, R.G and A.H performed AIMD, Periodic TD-DFT  
515 Excited State Calculations and Periodic Structure Geometry Optimisation calculations. A.D.S,  
516 M.N.Q, M.T.R, S.T.J, L.G, J.A.Z, D.C, A.H and G.S.K.S contributed to manuscript writing. All  
517 authors have given approval to the final version of the manuscript.

518

#### 519 **Notes**

520 The authors declare no competing financial interest.

521

#### 522 **Acknowledgments**

523 G.S.K.S. acknowledges funding from the Wellcome Trust, the UK Medical Research Council  
524 (MRC), Alzheimer Research UK (ARUK), and Infinitus China Ltd. A.D.S. acknowledge

525 Alzheimer Research UK the British Biophysical Society (BSS) for travel grants. P.J.W  
 526 acknowledges EPSRC funding (EP/L016087/1).

527

528

529

530

531

532

533

534

535 **Supplementary data**

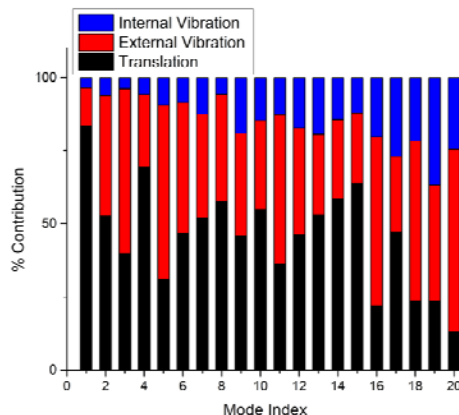

| Mode Number | Frequency (THz) | Intensity (km mol <sup>-1</sup> ) | Assignment                                                                                              |
|-------------|-----------------|-----------------------------------|---------------------------------------------------------------------------------------------------------|
| 1           | 0.955           | 0.22                              | Antisymmetric translation in b                                                                          |
| 2           | 1.215           | 0.71                              | Coupled translation in a and rotation about bc                                                          |
| 3           | 1.325           | 1.52                              | external rotation about b                                                                               |
| 4           | 1.450           | 0.36                              | Asymmetric translation in c                                                                             |
| 5           | 1.554           | 4.37                              | External rotation about a                                                                               |
| 6           | 1.676           | 1.76                              | Translation in a and external asymmetric rotation about H-bond coordinate                               |
| 7           | 1.805           | 2.28                              | External asymmetric rotation of dimer pairs                                                             |
| 8           | 1.929           | 2.11                              | External symmetric rotation of dimer pairs                                                              |
| 9           | 1.950           | 1.28                              | Asymmetric rotation about H-bond coordinate, ammonium translational motion                              |
| 10          | 2.113           | 3.53                              | Translation and rotation (breathing) around ammonium cation                                             |
| 11          | 2.208           | 2.5                               | Symmetric external rotation of entire formula units                                                     |
| 12          | 2.404           | 2.37                              | In phase external rotation perpendicular to H-bond coordinate                                           |
| 13          | 2.502           | 0.45                              | Out of phase external rotation perpendicular to H-bond coordinate                                       |
| 14          | 2.564           | 0.73                              | External out of phase rotation of H-bonded chains about b                                               |
| 15          | 2.565           | 8.91                              | Out of phase external rotation of individual pyroglutamic molecules with translation of ammonium cation |
| 16          | 2.654           | 18.09                             | External vibration coupled with torsion of the COOH group                                               |
| 17          | 2.679           | 0.29                              | External rotation and torsion of pyroglutamic ring                                                      |
| 18          | 2.776           | 4.94                              | External rotation and torsion of ring and carboxyl group                                                |
| 19          | 2.988           | 2.66                              | External rotation and translation of ammonium                                                           |

536

537 **Supplementary Figure 1. Full spectral assignment of THz data.**

538 The top chart shows the contribution to each IR-active mode including external translations  
 539 and hindered rotations, and internal vibrational motions (i.e. torsions), while the bottom  
 540 table lists the detailed assignment for each mode.

541

542

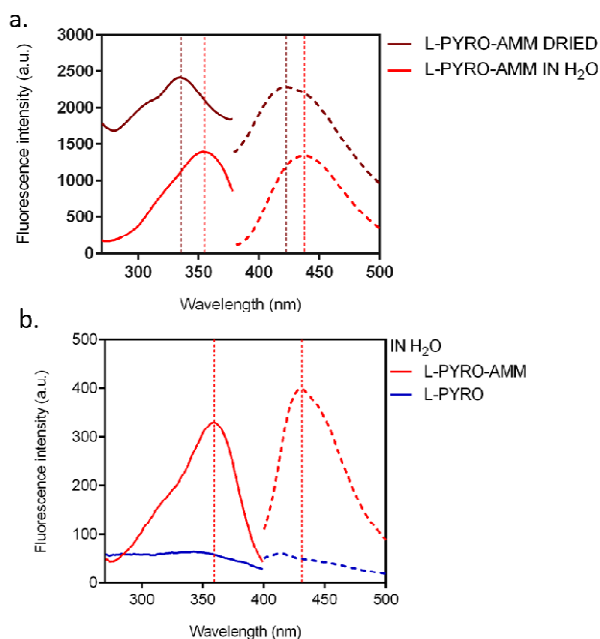

543

544 **Supplementary Figure 2. L-pyro-amm has blue shifted fluorescence when dried and**  
545 **displays higher fluorescence intensity than L-pyro.**

546 (a) The excitation peak of L-pyro-amm when dried (solid dark red line) is blue shifted with a  
547 peak maximum ~ 340 nm compared to L-pyro-amm in H<sub>2</sub>O (solid red line) which has a peak  
548 maximum ~ 360 nm. The emission peak of L-pyro-amm when dried (dashed dark red line) is  
549 also blue shifted, with a peak maximum ~ 420 nm, compared to L-pyro-amm in H<sub>2</sub>O (dashed  
550 red line) with a peak maximum ~ 430 nm. (b) 1 M L-glu and 1 M L-pyro (blue) were  
551 incubated in H<sub>2</sub>O for 8 days at 65°C. After 9 days, the L-glu had converted into the L-pyro-  
552 amm structure (red). L-pyro-amm has a clear excitation peak maximum at ~360 nm and  
553 emission peak maximum at ~ 430 nm, while L-pyro (blue), although not completely dark, has  
554 no clear excitation or emission peak.

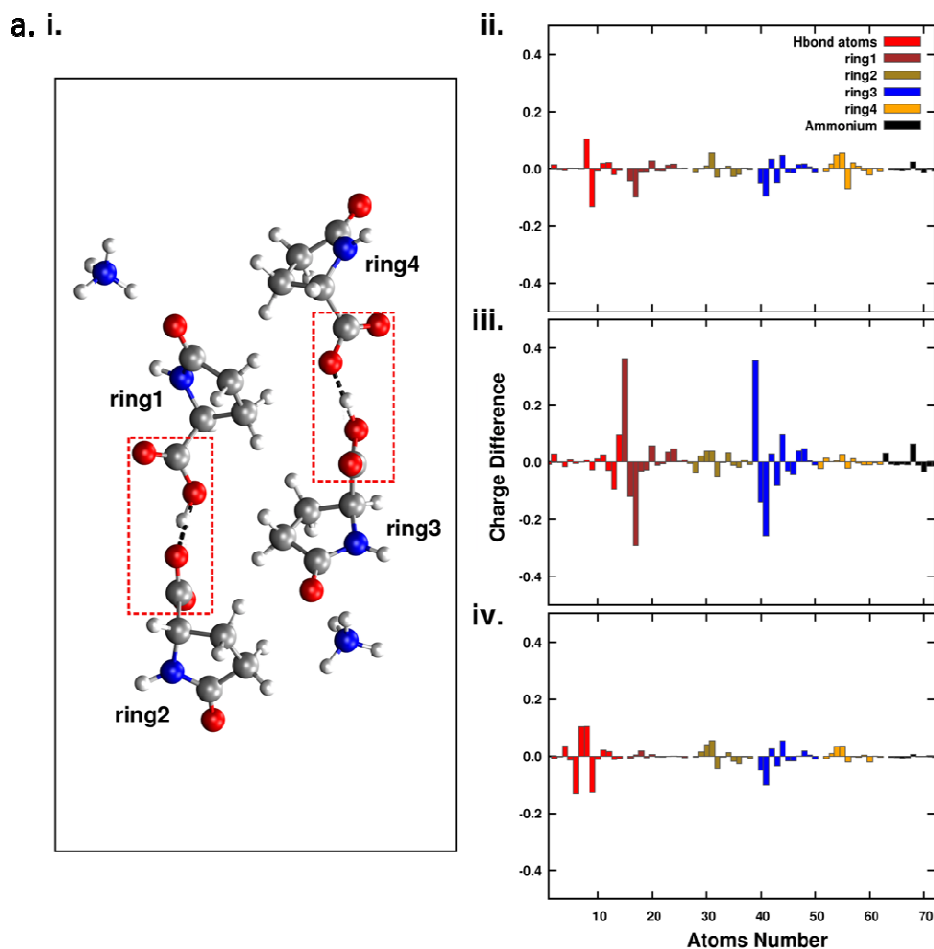

555

556 **Supplementary Figure 3. The optical properties of L-pyro-amm are sensitive to the**  
557 **environment and involves the electronic response of the entire structure.**

558 (a)(i) L-pyro-amm cluster used to examine the sensitivity of the optical response on different  
559 parts of the cluster upon moving different protons. (ii) Charge differences between the  
560 ground and excited state are computed using restrained electrostatic potential atomic  
561 partial charges (RESP) for the cluster shown in i). Note, the electronic response involves all  
562 the atoms of the cluster. (iii) The two protons in the rectangle regions are displaced to be in  
563 the centre of the hydrogen bond and the charge differences are then computed. As  
564 illustrated, the proton displacement leads to a larger change in magnitude of the charges.  
565 (iv) The charge differences are computed for another nuclear configuration for which the  
566 protons are kept fixed but the O—O distance is increased from 2.45 to 3.2 Angstroms. The  
567 charge differences obtained here are quite similar to the original condition shown in (ii).

568

569

570 **References:**

- 571 1. A. Shukla, S. Mukherjee, S. Sharma, V. Agrawal, K. V. R. Kishan, P. Guptasarma, A  
572 novel UV laser-induced visible blue radiation from protein crystals and aggregates:  
573 Scattering artifacts or fluorescence transitions of peptide electrons delocalized  
574 through hydrogen bonding? *Arch. Biochem. Biophys.* **428**, 144–153 (2004).
- 575 2. G. Rosenman, N. Amdursky, M. Molotskii, D. Aronov, L. Adler-Abramovich, E. Gazit,  
576 Blue luminescence based on quantum confinement at peptide nanotubes. *Nano Lett.*  
577 **9**, 3111–3115 (2009).
- 578 3. F. T. Chan, D. Pinotsi, G. S. K. Schierle, C. F. Kaminski, in *Bio-nanoimaging: Protein*  
579 *Misfolding and Aggregation* (Elsevier, 2013;  
580 <http://linkinghub.elsevier.com/retrieve/pii/B9780123944313000134>), pp. 147–155.
- 581 4. F. T. S. Chan, G. S. Kaminski Schierle, J. R. Kumita, C. W. Bertoncini, C. M. Dobson, C. F.  
582 Kaminski, C. V Robinson, C. M. Dobson, J. Beard, P. Das, K. Jansen, M. DeLucia, W.-L.  
583 Lin, G. Dolios, R. Wang, C. B. Eckman, D. W. Dickson, M. Hutton, J. Hardy, T. Golde,  
584 Protein amyloids develop an intrinsic fluorescence signature during aggregation.  
585 *Analyst.* **138**, 2156 (2013).
- 586 5. D. Pinotsi, L. Grisanti, P. Mahou, R. Gebauer, C. F. Kaminski, A. Hassanali, G. S.  
587 Kaminski Schierle, Proton Transfer and Structure-Specific Fluorescence in Hydrogen  
588 Bond-Rich Protein Structures. *J. Am. Chem. Soc.* **138**, 3046–3057 (2016).
- 589 6. J. Pansieri, V. Jossierand, S. J. Lee, A. Rongier, D. Imbert, M. M. Sallanon, E. Kövari, T.  
590 G. Dane, C. Vendrely, O. Chaix-Pluchery, M. Guidetti, J. Voltaire, A. Fertin, Y. Usson, P.  
591 Rannou, J. L. Coll, C. Marquette, V. Forge, Ultraviolet–visible–near-infrared optical  
592 properties of amyloid fibrils shed light on amyloidogenesis. *Nat. Photonics.* **13**, 473–  
593 479 (2019).
- 594 7. L. Adler-Abramovich, E. Gazit, Correction: The physical properties of supramolecular  
595 peptide assemblies: From building block association to technological applications.  
596 *Chem. Soc. Rev.* **43**, 7236–7236 (2014).
- 597 8. L. Adler-Abramovich, M. Reches, V. L. Sedman, S. Allen, S. J. B. Tendler, E. Gazit,  
598 Thermal and chemical stability of diphenylalanine peptide nanotubes: Implications for  
599 nanotechnological applications. *Langmuir.* **22**, 1313–1320 (2006).
- 600 9. K. Tao, P. Makam, R. Aizen, E. Gazit, Self-assembling peptide semiconductors. *Science*  
601 (80-. ). **358** (2017), p. eaam9756.

- 602 10. J. M. Andresen, J. Gayán, L. Djoussé, S. Roberts, D. Brocklebank, S. S. Cherny, L. R.  
603 Cardon, J. F. Gusella, M. E. Macdonald, R. H. Myers, D. E. Housman, N. S. Wexler, J.  
604 Lorimer, J. Porter, F. Gomez, C. Moskowitz, K. P. Gerstenhaber, E. Shackell, K. Marder,  
605 G. Penchaszadeh, S. A. Roberts, A. Brickman, D. Brocklebank, J. Gray, S. R. Dlouhy, S.  
606 Wiktorski, M. E. Hodes, P. M. Conneally, J. B. Penney, J. F. Gusella, J. H. Cha, M.  
607 Irizarry, D. Rosas, S. Hersch, Z. Hollingsworth, A. B. Young, D. E. Housman, M. M. de  
608 Young, E. Bonilla, T. Stillings, A. Negrette, S. R. Snodgrass, M. D. Martinez-Jaurrieta,  
609 M. A. Ramos-Arroyoh, J. Bickham, J. S. Ramos, F. Marshall, I. Shoulson, G. J. Rey, A.  
610 Feigin, N. Arnheim, A. Acevedo-Cruz, L. Acosta, J. Alvir, K. Fischbeck, L. M. Thompson,  
611 A. Young, L. Dure, C. J. O'Brien, J. Paulsen, S. P. Moran, D. Krch, P. Hogarth, D. S.  
612 Higgins, B. Landwehrmeyer, M. R. Hayden, E. W. Almqvist, R. R. Brinkman, O.  
613 Suchowersky, A. Durr, C. C. Dodé, F. Squitieri, P. J. Morrison, M. Nance, C. A. Ross, R.  
614 L. Margolis, A. Rosenblatt, G. T. Estrella, D. M. Cabrero, R. J. A. Trent, E. McCusker, A.  
615 Novelletto, M. Frontali, J. S. Paulsen, R. Jones, A. Zanko, T. Ashizawa, A. Lazzarini, J. L.  
616 Li, V. C. Wheeler, A. L. Russ, G. Xu, J. S. Mysore, T. Gillis, M. Hakky, L. A. Cupples, M.  
617 Saint-Hilaire, S. M. Hersch, The relationship between CAG repeat length and age of  
618 onset differs for Huntington's disease patients with juvenile onset or adult onset.  
619 *Ann. Hum. Genet.* **71**, 295–301 (2007).
- 620 11. D. Pinotsi, A. K. Buell, C. M. Dobson, G. S. Kaminski Schierle, C. F. Kaminski, A Label-  
621 Free, Quantitative Assay of Amyloid Fibril Growth Based on Intrinsic Fluorescence.  
622 *ChemBioChem.* **14**, 846–850 (2013).
- 623 12. T. N. Tikhonova, N. R. Rovnyagina, A. Y. Zhrebker, N. N. Sluchanko, A. A. Rubekina, A.  
624 S. Orekhov, E. N. Nikolaev, V. V. Fadeev, V. N. Uversky, E. A. Shirshin, Dissection of the  
625 deep-blue autofluorescence changes accompanying amyloid fibrillation. *Arch.*  
626 *Biochem. Biophys.* **651**, 13–20 (2018).
- 627 13. H. Mori, K. Takio, M. Ogawara, D. J. Selkoe, Mass spectrometry of purified amyloid  $\beta$   
628 protein in Alzheimer's disease. *J. Biol. Chem.* **267**, 17082–17086 (1992).
- 629 14. M. Fändrich, C. M. Dobson, The behaviour of polyamino acids reveals an inverse side  
630 chain effect in amyloid structure formation. *EMBO J.* **21**, 5682–90 (2002).
- 631 15. R. Dovesi, A. Erba, R. Orlando, C. M. Zicovich-Wilson, B. Civalleri, L. Maschio, M. Rérat,  
632 S. Casassa, J. Baima, S. Salustro, B. Kirtman, Quantum-mechanical condensed matter  
633 simulations with CRYSTAL. *Wiley Interdiscip. Rev. Comput. Mol. Sci.* **8**, e1360 (2018).



- 634 16. P. Giannozzi, O. Andreussi, T. Brumme, O. Bunau, M. Buongiorno Nardelli, M.  
635 Calandra, R. Car, C. Cavazzoni, D. Ceresoli, M. Cococcioni, N. Colonna, I. Carnimeo, A.  
636 Dal Corso, S. De Gironcoli, P. Delugas, R. A. Distasio, A. Ferretti, A. Floris, G. Fratesi, G.  
637 Fugallo, R. Gebauer, U. Gerstmann, F. Giustino, T. Gorni, J. Jia, M. Kawamura, H. Y. Ko,  
638 A. Kokalj, E. Küçükbenli, M. Lazzeri, M. Marsili, N. Marzari, F. Mauri, N. L. Nguyen, H.  
639 V. Nguyen, A. Otero-De-La-Roza, L. Paulatto, S. Poncé, D. Rocca, R. Sabatini, B. Santra,  
640 M. Schlipf, A. P. Seitsonen, A. Smogunov, I. Timrov, T. Thonhauser, P. Umari, N. Vast,  
641 X. Wu, S. Baroni, Advanced capabilities for materials modelling with Quantum  
642 ESPRESSO. *J. Phys. Condens. Matter.* **29** (2017), doi:10.1088/1361-648X/aa8f79.
- 643 17. M. T. Ruggiero, J. Gooch, J. Zubieta, T. M. Korter, Evaluation of Range-Corrected  
644 Density Functionals for the Simulation of Pyridinium-Containing Molecular Crystals. *J.*  
645 *Phys. Chem. A.* **120**, 939–947 (2016).
- 646 18. J. Da Chai, M. Head-Gordon, Long-range corrected hybrid density functionals with  
647 damped atom-atom dispersion corrections. *Phys. Chem. Chem. Phys.* **10**, 6615–6620  
648 (2008).
- 649 19. D. Rocca, R. Gebauer, Y. Saad, S. Baroni, Turbo charging time-dependent density-  
650 functional theory with Lanczos chains. *J. Chem. Phys.* **128** (2008),  
651 doi:10.1063/1.2899649.
- 652 20. N. Troullier, J. L. Martins, Efficient pseudopotentials for plane-wave calculations.  
653 *Phys. Rev. B.* **43**, 1993–2006 (1991).
- 654 21. A. D. Becke, Density-functional thermochemistry. III. The role of exact exchange. *J.*  
655 *Chem. Phys.* **98**, 5648–5652 (1993).
- 656 22. J. D. Head, M. C. Zerner, A Broyden-Fletcher-Goldfarb-Shanno optimization procedure  
657 for molecular geometries. *Chem. Phys. Lett.* **122**, 264–270 (1985).
- 658 23. J. VandeVondele, M. Krack, F. Mohamed, M. Parrinello, T. Chassaing, J. Hutter,  
659 Quickstep: Fast and accurate density functional calculations using a mixed Gaussian  
660 and plane waves approach. *Comput. Phys. Commun.* **167**, 103–128 (2005).
- 661 24. S. Goedecker, M. Teter, Separable dual-space Gaussian pseudopotentials. *Phys. Rev.*  
662 *B - Condens. Matter Mater. Phys.* **54**, 1703–1710 (1996).
- 663 25. A. D. Becke, Density-functional exchange-energy approximation with correct  
664 asymptotic behavior. *Phys. Rev. A.* **38**, 3098–3100 (1988).
- 665 26. S. Grimme, J. Antony, S. Ehrlich, H. Krieg, A consistent and accurate *ab initio*

- 666 parametrization of density functional dispersion correction (DFT-D) for the 94  
667 elements H-Pu. *J. Chem. Phys.* **132**, 154104 (2010).
- 668 27. G. Bussi, D. Donadio, M. Parrinello, Canonical sampling through velocity rescaling. *J.*  
669 *Chem. Phys.* **126** (2007), doi:10.1063/1.2408420.
- 670 28. T. Yanai, D. P. Tew, N. C. Handy, A new hybrid exchange-correlation functional using  
671 the Coulomb-attenuating method (CAM-B3LYP). *Chem. Phys. Lett.* **393**, 51–57 (2004).
- 672 29. K. Jong, Y. Taghipour Azar, L. Grisanti, A. D. Stephens, S. T. E. Jones, D. Credgington, G.  
673 S. Kaminski Schierle, A. A. Hassanali, Low Energy Optical Excitations as an Indicator of  
674 Structural Changes Initiated at the Termini of Amyloid Protein. *Phys. Chem. Chem.*  
675 *Phys.* (2019), doi:10.1039/c9cp04648h.
- 676 30. L. Grisanti, D. Pinotsi, R. Gebauer, G. S. Kaminski Schierle, A. A. Hassanali, A  
677 computational study on how structure influences the optical properties in model  
678 crystal structures of amyloid fibrils. *Phys. Chem. Chem. Phys.* **19**, 4030–4040 (2017).
- 679 31. E. P. J. Parrott, J. A. Zeitler, Terahertz time-domain and low-frequency Raman  
680 spectroscopy of organic materials. *Appl. Spectrosc.* **69**, 1–25 (2015).
- 681 32. Y. K. Law, A. A. Hassanali, Role of Quantum Vibrations on the Structural, Electronic,  
682 and Optical Properties of 9-Methylguanine. *J. Phys. Chem. A.* **119**, 10816–10827  
683 (2015).
- 684 33. S. Sappati, A. Hassanali, R. Gebauer, P. Ghosh, Nuclear quantum effects in a  
685 HIV/cancer inhibitor: The case of ellipticine. *J. Chem. Phys.* **145** (2016),  
686 doi:10.1063/1.4968046.
- 687 34. Y. K. Law, A. A. Hassanali, The importance of nuclear quantum effects in spectral line  
688 broadening of optical spectra and electrostatic properties in aromatic chromophores.  
689 *J. Chem. Phys.* **148** (2018), doi:10.1063/1.5005056.
- 690 35. D. Marx, Erratum: Proton transfer 200 years after von grotthuss: Insights from Ab  
691 initio simulations (*ChemPhysChem* (2006) 7 (1848-1810)). *ChemPhysChem.* **8**, 209–  
692 210 (2007).
- 693 36. S. Prasad, I. Mandal, S. Singh, A. Paul, B. Mandal, R. Venkatramani, R. Swaminathan,  
694 Near UV-Visible electronic absorption originating from charged amino acids in a  
695 monomeric protein. *Chem. Sci.* **8**, 5416–5433 (2017).
- 696 37. I. Mandal, S. Paul, R. Venkatramani, Optical backbone-sidechain charge transfer  
697 transitions in proteins sensitive to secondary structure and modifications. *Faraday*

- 698 *Discuss.* **207**, 115–135 (2018).
- 699 38. M. Mališ, Y. Loquais, E. Gloaguen, H. S. Biswal, F. Piuze, B. Tardivel, V. Brenner, M.  
700 Broquier, C. Jouvét, M. Mons, N. D. S. Došlić, I. Ljubić, Unraveling the mechanisms of  
701 nonradiative deactivation in model peptides following photoexcitation of a  
702 phenylalanine residue. *J. Am. Chem. Soc.* **134**, 20340–20351 (2012).
- 703 39. B. P. Fingerhut, K. E. Dorfman, S. Mukamel, Monitoring nonadiabatic dynamics of the  
704 RNA base uracil by UV pump-IR probe spectroscopy. *J. Phys. Chem. Lett.* **4**, 1933–  
705 1942 (2013).
- 706 40. M. Sapunar, T. Ayari, N. Došlić, Comparative study of the photodynamics of  
707 malonaldehyde and acetylacetone. *Chem. Phys.* **515**, 622–627 (2018).
- 708 41. S. K. Joseph, N. Kuritz, E. Yahel, N. Lapshina, G. Rosenman, A. Natan, Proton-Transfer-  
709 Induced Fluorescence in Self-Assembled Short Peptides. *J. Phys. Chem. A.* **123**, 1758–  
710 1765 (2019).
- 711 42. A. Handelman, N. Kuritz, A. Natan, G. Rosenman, Reconstructive Phase Transition in  
712 Ultrashort Peptide Nanostructures and Induced Visible Photoluminescence.  
713 *Langmuir.* **32** (2016), pp. 2847–2862.
- 714 43. L. L. Del Mercato, P. P. Pompa, G. Maruccio, A. Della Torre, S. Sabella, A. M.  
715 Tamburro, R. Cingolani, R. Rinaldi, Charge transport and intrinsic fluorescence in  
716 amyloid-like fibrils. *Proc Natl Acad Sci U S A.* **104**, 18019–18024 (2007).
- 717 44. A. Stavrinides, E. C. Tasis, L. Caputi, E. Foureau, C. E. M. Stevenson, D. M. Lawson, V.  
718 Courdavault, S. E. O'Connor, Structural investigation of heteroyohimbine alkaloid  
719 synthesis reveals active site elements that control stereoselectivity. *Nat. Commun.* **7**  
720 (2016), doi:10.1038/ncomms12116.
- 721 45. F. Forneris, D. P. H. M. Heuts, M. Delvecchio, S. Roviđa, M. W. Fraaije, A. Mattevi,  
722 Structural analysis of the catalytic mechanism and stereoselectivity in *Streptomyces*  
723 *coelicolor* alditol oxidase. *Biochemistry.* **47**, 978–985 (2008).
- 724 46. S. Yamaguchi, H. Kamikubo, K. Kurihara, R. Kuroki, N. Niimura, N. Shimizu, Y.  
725 Yamazaki, M. Kataoka, Low-barrier hydrogen bond in photoactive yellow protein.  
726 *Proc. Natl. Acad. Sci. U. S. A.* **106**, 440–444 (2009).
- 727 47. W. W. Cleland, P. A. Frey, J. A. Gerlt, The low barrier hydrogen bond in enzymatic  
728 catalysis. *J. Biol. Chem.* **273** (1998), pp. 25529–25532.
- 729 48. S. Zhou, L. Wang, Unraveling the structural and chemical features of biological short

730 hydrogen bonds. *Chem. Sci.* **10**, 7734–7745 (2019).

731
